# Supplementary material
Source: PubMed Central journal article supplement (PMC1422737)
Supplement: pcbi.0020014.sg001.pdf [file pcbi.0020014.sg001.pdf]

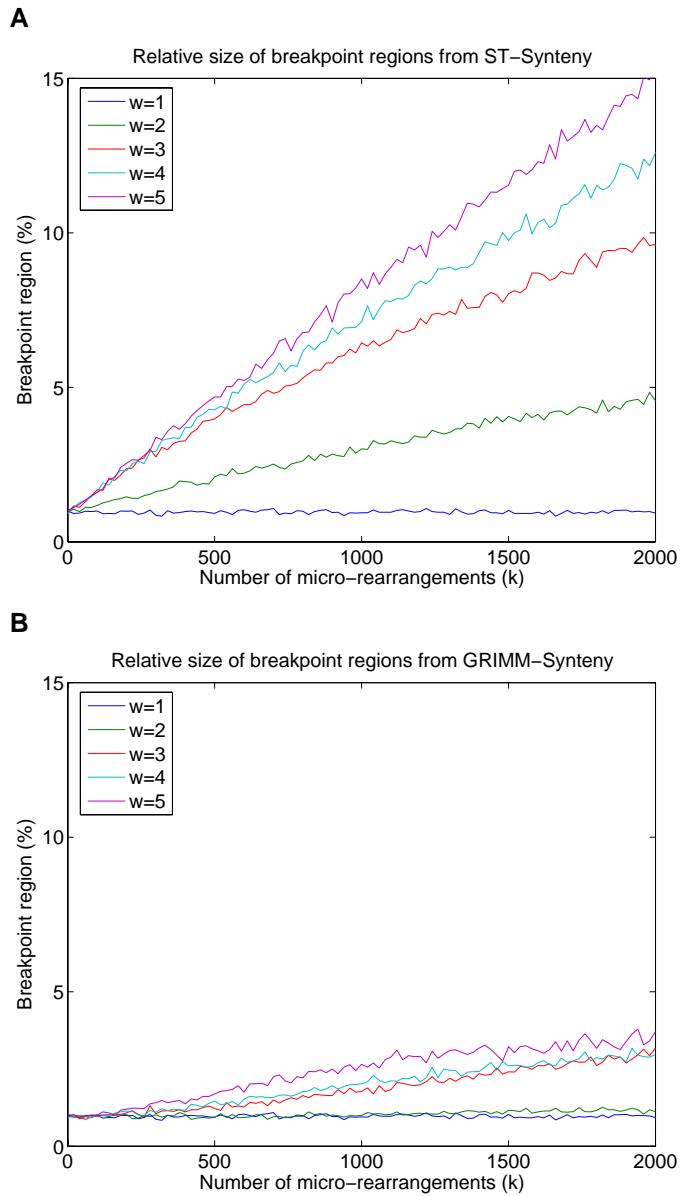

Figure S1. Breakpoint region size in simulations. Ratio of length of breakpoint region to length of genome in simulations as a function of number of micro-rearrangements  $k$  and micro-rearrangement size  $w$ , for (A) ST-Synteny, and (B) GRIMM-Synteny.
