# Supplementary material
Source: PubMed Central journal article supplement (PMC1422737)
Supplement: pcbi.0020014.sg002.pdf [file pcbi.0020014.sg002.pdf]

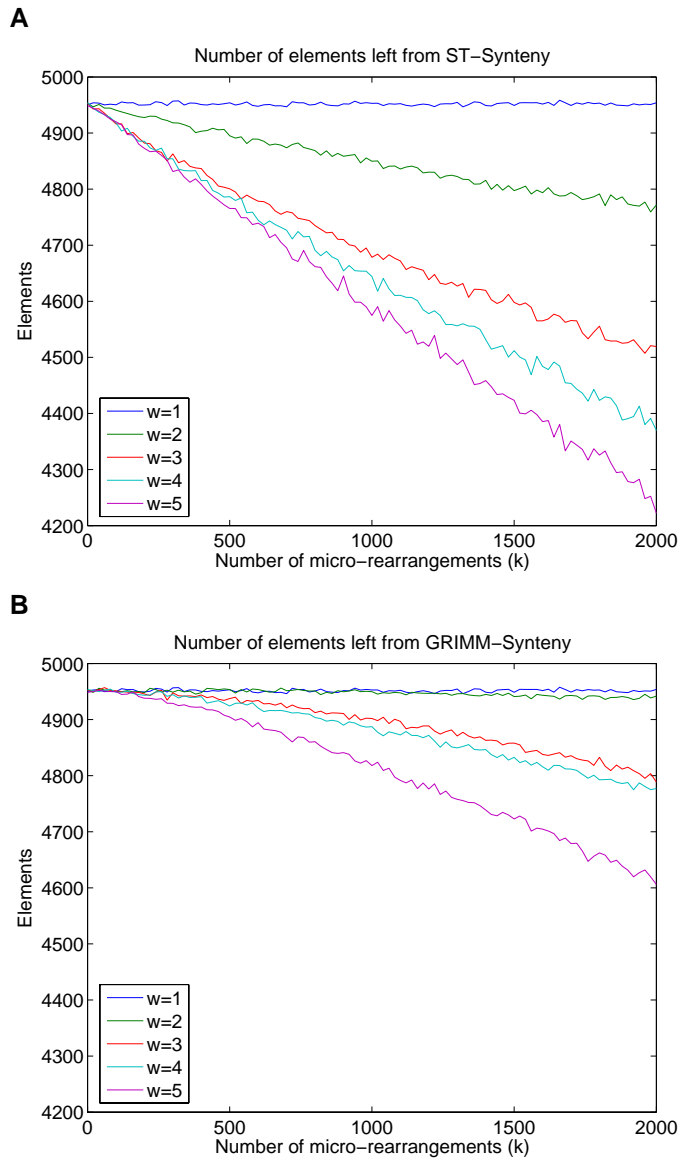

Figure S2. Number of elements retained in simulations after deletion of small blocks. Number of elements retained by (A) ST-Synteny and (B) GRIMM-Synteny, as a function of the number of micro-rearrangements  $k$  and micro-rearrangement size  $w$  in the simulated data.
